# Supplementary material for: A Temporary Acrylic Soft Denture Lining Material Enriched with Silver-Releasing Filler-Cytotoxicity, Mechanical and Antifungal Properties
Source: MDPI journal article supplement (doi:10.3390/ma17040902), 2024-02-15
Supplement: s1 [file s1]

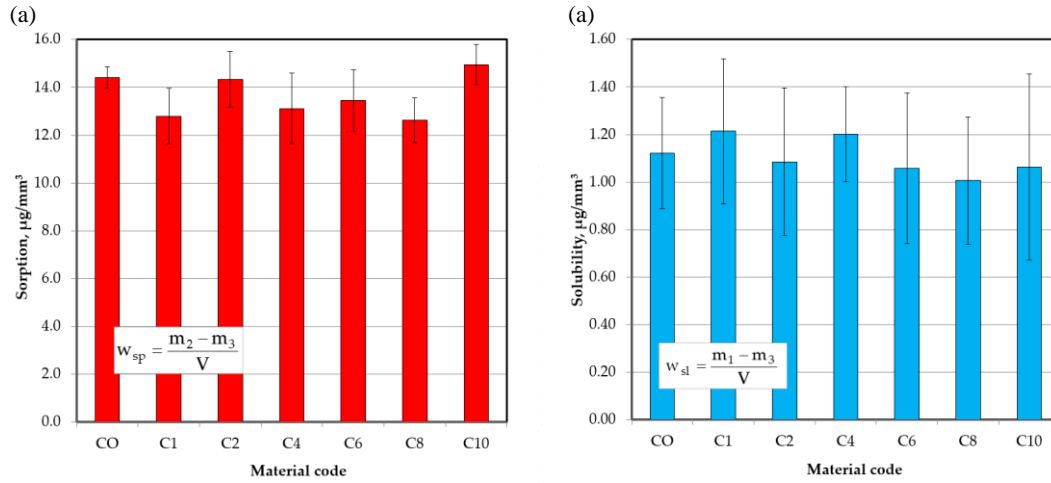

**Figure S1.** Mean sorption (a) and solubility (b) calculated using EN ISO 10139-2:2016 formulas ( $w_{sp}$  is sorption,  $w_{sl}$  is solubility,  $m_1$  is the initial mass of dried sample,  $\mu\text{g}$ ;  $m_2$  is the mass after storing,  $\mu\text{g}$ , and  $m_3$  is the mass after the second drying,  $\mu\text{g}$  and  $V$  is the volume of the sample,  $\text{mm}^3$ ).

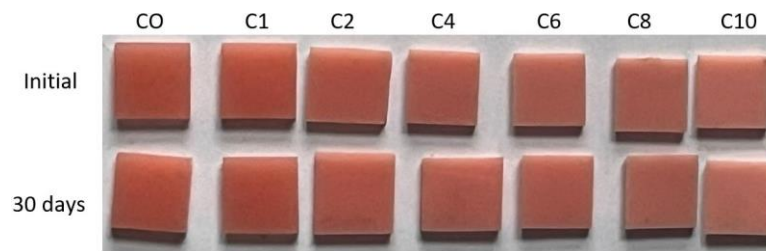

**Figure S2.** Photograph of samples of the control material and composites in their initial state and after conditioning, visible progressive lightening of the materials after the introduction of the filler.
